# Supplementary material
Source: PubMed Central journal article supplement (PMC4147612)
Supplement: amiajnl-2013-002139-s1.pdf [file amiajnl-2013-002139-s1.pdf]

Supplement 1

---

**Algorithm 1:** Multi-part matching

---

**Input :** target ontology  $O^* = ((SO^*_1, \dots, SO^*_n), C^*)$ ,  
**similarity thresholds**  $subThresholds = [\tau_1, \dots, \tau_n]$  for sub-ontologies  
 $(SO^*_1, \dots, SO^*_n)$

**Output :**

- 1  $r' \leftarrow [\emptyset, \dots, \emptyset]$ ;
- 2 **for**  $i = 1$  **to**  $n$  **do**
- 3      $bestSim \leftarrow 0$ ;  $bestTarget \leftarrow \emptyset$ ;
- 4     **foreach**  $c'_i \in SO^*_i$
- 5          $condProb \leftarrow \text{computeCondProbability}(c'_i, [(r'_1, \dots, r'_{i-1})])$ ;
- 6         //
- 7         **calculates conditional probability**  $P(c'_i | r'_1, \dots, r'_{i-1}) = \frac{N(SO^*_i = c'_i \cap SO^*_{i-1} = r'_{i-1} \cap \dots \cap SO^*_1 = r'_1)}{N(SO^*_{i-1} = r'_{i-1} \cap \dots \cap SO^*_1 = r'_1)}$
- 8         **if**  $condProb \geq 0$  **then**
- 9              $sim \leftarrow \text{computeSimilarity}$
- 10             **if**  $sim > bestSim$  **then**
- 11                  $bestSim \leftarrow sim$ ;
- 12                  $bestTarget \leftarrow c'_i$ ;
- 13         **end**
- 14     **if**  $bestSim > \tau_i$  **then**
- 15          $r'_i \leftarrow bestTarget$ ;
- 16     **end**
- 17 **return**  $r'$ ;

---
