# Supplementary material
Source: PubMed Central journal article supplement (PMC4147612)
Supplement: amiajnl-2013-002139-s2.pdf [file amiajnl-2013-002139-s2.pdf]

## Supplement 2

---

### Algorithm 2: computeRecommendations

---

**Input :**

$k$ ,  
number of maximum recommendations per part  $k$

**Output :**  $r^f$

```
1 foreach  $r_i \in r^f$  do
2   if  $r_i == \emptyset$  then
3      $topK \leftarrow \text{get\_TopK}(c_i, SO'_i, k)$ ; // determines top  $k$  matches for  $c_i$  by sim (MaxN
selection)
4      $r_i \leftarrow topK$ ;
5 end
6 return  $r^f$ ;
```

---
